# Supplementary material for: Ensartinib vs Crizotinib for Patients With Anaplastic Lymphoma Kinase−Positive Non–Small Cell Lung Cancer: A Randomized Clinical Trial
Source: PubMed Central journal article supplement — JAMA Oncol. 2021 Sep 2;7(11):1–9. doi: 10.1001/jamaoncol.2021.3523 (PMC8414368; doi:10.1001/jamaoncol.2021.3523), 2021-09-02

## Supplementary Online Content

Horn L, Wang Z, Wu G, et al. Ensartinib vs crizotinib for patients with anaplastic lymphoma kinase–positive non–small cell lung cancer: a randomized clinical trial.

*JAMA Oncol.* Published online September 2, 2021.

doi:10.1001/jamaoncol.2021.3523

**eTable 1.** Rates of Confirmed Objective Response by BIRC

**eTable 2.** Treatment-Emergent Adverse Events in  $\geq 10\%$  of the Safety Population

**eTable 3.** List of Investigators

**eFigure 1.** Randomization Schema for ITT and mITT Populations

**eFigure 2.** BIRC-Assessed Best Systemic Change from Baseline in the mITT Population

**eFigure 3.** BIRC-Assessed Intracranial Best Change from Baseline in Patients with Measurable and Evaluable Brain Metastases in the mITT Population.

**eFigure 4.** BIRC-Assessed Time to Progression in the Brain in Patients Without Brain Metastases at Baseline in the Modified Intention-to-Treat Population

**eFigure 5.** Median Progression-Free Survival (mPFS) in Patients with Brain Metastases at Baseline in mITT

This supplementary material has been provided by the authors to give readers additional information about their work.

**eTable 1.** Rates of Confirmed Objective Response by BIRC<sup>a</sup>

| <b>Variable</b>                   | <b>Ensartinib</b> | <b>Crizotinib</b> |
|-----------------------------------|-------------------|-------------------|
| <b>ITT population</b>             |                   |                   |
| No. of patients                   | 143               | 147               |
| Objective response                |                   |                   |
| No. of patients                   | 106               | 98                |
| % (95% CI)                        | 74 (66 - 81)      | 67 (58 - 74)      |
| Complete response – no. (%)       | 17 (12)           | 8 (5)             |
| Partial response – no. (%)        | 89 (62)           | 90 (61)           |
| Duration of response <sup>b</sup> |                   |                   |
| No. of patients                   | 106               | 98                |
| Median (95% CI) – mo              | NR (22 - NR)      | 27 (13 - NR)      |
| <b>mITT population</b>            |                   |                   |
| No. of patients                   | 121               | 126               |
| Objective response                |                   |                   |
| No. of patients                   | 91                | 85                |
| % (95% CI)                        | 75 (67 - 83)      | 68 (59 - 76)      |
| Complete response – no. (%)       | 17 (14)           | 7 (6)             |
| Partial response – no. (%)        | 74 (61)           | 78 (62)           |
| Duration of response <sup>b</sup> |                   |                   |
| No. of patients                   | 91                | 85                |
| Median (95% CI) – mo              | NR (22 - NR)      | 27 (11 - NR)      |

<sup>a</sup>Best response considered both systemic disease and CNS metastases (RECIST version 1.1 Combined Outcome). Best response assigned depended on the achievement of both measurement and confirmation criteria.

<sup>b</sup>Median duration of response in patients with confirmed response or partial response.

Abbreviations: CNS, central nervous system; ITT, intention to treat; mITT, modified intention to treat; NR, not reached; RECIST, Response Evaluation Criteria in Solid Tumors.

**eTable 2.** Treatment-Emergent Adverse Events in ≥10% of the Safety Population

| Event<br>n (%)                       | Ensartinib (N=143) |           |         |         | Crizotinib (N=146) |           |         |         |
|--------------------------------------|--------------------|-----------|---------|---------|--------------------|-----------|---------|---------|
|                                      | Grade 1–2          | Grade 3   | Grade 4 | Grade 5 | Grade 1–2          | Grade 3   | Grade 4 | Grade 5 |
| Any AE                               | 69 (48.3)          | 64 (44.8) | 7 (4.9) | 1 (0.7) | 83 (56.8)          | 52 (35.6) | 6 (4.1) | 4 (2.7) |
| Rash (all) <sup>a</sup>              | 85 (59.4)          | 16 (11.2) | 0       | 0       | 15 (10.3)          | 0         | 0       | 0       |
| Alanine aminotransferase increased   | 66 (46.2)          | 6 (4.2)   | 0       | 0       | 58 (39.7)          | 11 (7.5)  | 0       | 0       |
| Aspartate aminotransferase increased | 53 (37.1)          | 1 (0.7)   | 0       | 0       | 53 (36.3)          | 4 (2.7)   | 0       | 0       |
| Constipation                         | 45 (31.5)          | 0         | 0       | 0       | 38 (26.0)          | 0         | 0       | 0       |
| Cough                                | 43 (30.1)          | 1 (0.7)   | 0       | 0       | 20 (13.7)          | 0         | 0       | 0       |
| Pruritus (all) <sup>b</sup>          | 40 (28.0)          | 3 (2.1)   | 0       | 0       | 7 (4.8)            | 0         | 0       | 0       |
| Nausea                               | 38 (26.6)          | 2 (1.4)   | 0       | 0       | 41 (28.1)          | 3 (2.1)   | 0       | 0       |
| Edema (all) <sup>c</sup>             | 36 (25.2)          | 3 (2.1)   | 0       | 0       | 38 (26.0)          | 3 (2.1)   | 0       | 0       |
| Anemia                               | 31 (21.7)          | 1 (0.7)   | 0       | 0       | 17 (11.6)          | 2 (1.4)   | 0       | 0       |
| Blood alkaline phosphatase increased | 29 (20.3)          | 1 (0.7)   | 0       | 0       | 24 (16.4)          | 1 (0.7)   | 0       | 0       |
| Pyrexia                              | 28 (19.6)          | 1 (0.7)   | 0       | 0       | 13 (8.9)           | 1 (0.7)   | 0       | 0       |
| Blood creatinine increased           | 27 (18.9)          | 0         | 0       | 0       | 21 (14.4)          | 0         | 0       | 0       |
| Vomiting                             | 22 (15.4)          | 1 (0.7)   | 0       | 0       | 46 (31.5)          | 0         | 0       | 0       |
| Decreased appetite                   | 22 (15.4)          | 0         | 0       | 0       | 15 (10.3)          | 2 (1.4)   | 0       | 0       |
| Gamma-glutamyltransferase increased  | 21 (14.7)          | 2 (1.4)   | 0       | 0       | 13 (8.9)           | 1 (0.7)   | 0       | 0       |
| Back pain                            | 20 (14.0)          | 0         | 0       | 0       | 10 (6.8)           | 0         | 0       | 0       |
| Pain in extremity                    | 18 (12.6)          | 0         | 0       | 0       | 12 (8.2)           | 0         | 0       | 0       |
| Arthralgia                           | 18 (12.6)          | 0         | 0       | 0       | 7 (4.8)            | 0         | 0       | 0       |
| Hypoalbuminemia                      | 17 (11.9)          | 0         | 0       | 0       | 20 (13.7)          | 1 (0.7)   | 0       | 0       |
| Upper respiratory tract infection    | 17 (11.9)          | 1 (0.7)   | 0       | 0       | 15 (10.3)          | 0         | 0       | 0       |
| Dizziness                            | 17 (11.9)          | 0         | 0       | 0       | 14 (9.6)           | 1 (0.7)   | 0       | 0       |
| Alopecia                             | 16 (11.2)          | 0         | 0       | 0       | 7 (4.8)            | 0         | 0       | 0       |
| Dysgeusia                            | 15 (10.5)          | 0         | 0       | 0       | 16 (11.0)          | 0         | 0       | 0       |
| Fatigue                              | 15 (10.5)          | 1 (0.7)   | 0       | 0       | 10 (6.8)           | 2 (1.4)   | 0       | 0       |
| Dry skin                             | 14 (9.8)           | 1 (0.7)   | 0       | 0       | 1 (0.7)            | 0         | 0       | 0       |
| Hyperuricemia                        | 13 (9.1)           | 1 (0.7)   | 1 (0.7) | 0       | 6 (4.1)            | 0         | 0       | 0       |

<sup>a</sup> Rash (all) includes dermatitis acneiform, erythema, erythema multiforme, rash, rash erythematous, rash follicular, rash macular, rash maculopapular, rash pruritic, skin exfoliation, rash pustular, eczema, lichenoid keratosis/dermatitis, photosensitivity reaction, rash generalized or any preferred term that contains "rash." <sup>b</sup> Pruritus (all) includes any preferred term that contains "pruritus." <sup>c</sup> Edema (all) includes any preferred term that contains "edema." Abbreviation: AE, adverse event;

**eTable 3.** List of Investigators

| <b>Investigator</b>   | <b>Institution</b>                                                                                |
|-----------------------|---------------------------------------------------------------------------------------------------|
| <b>United States</b>  |                                                                                                   |
| Leora Horn            | Vanderbilt University Medical Center, Vanderbilt-Ingram Cancer Center, Nashville, TN, USA         |
| Alberto Chiappori     | H. Lee Moffitt Cancer Center and Research Institute, Tampa, FL, USA                               |
| Saiama Waqar          | Washington University School of Medicine, St Louis, MO, USA                                       |
| Helen Ross            | Mayo Clinic, Phoenix, AZ, USA                                                                     |
| Rachel Sanborn        | Providence Cancer Center Oncology and Hematology Care Clinic–Eastside Portland, Portland, OR, USA |
| Joan Schiller         | Inova Schar Cancer Institute, Falls Church, VA, USA                                               |
| Igor Rybkin           | Henry Ford Hospital, Detroit, MI, USA                                                             |
| Liza Villaruz         | University of Pittsburgh Medical Center, Pittsburgh, PA, USA                                      |
| Ticiana Leal          | University of Wisconsin, Madison, WI, USA                                                         |
| David Chu             | North Shore Hematology Oncology dba NY Cancer and Blood Specialists, East Setauket, NY, USA       |
| Xingwei Sui           | Providence Regional North Shore Hematology Cancer System, Lacey, WA, USA                          |
| Jennifer Carney       | Kaiser Permanente Hawaii–Moanalua Medical Center, Honolulu, HI, USA                               |
| Petros Nikolinakos    | University Cancer and Blood Center, Athens, GA, USA                                               |
| Kerry Pulver          | Saint Alphonsus Regional Medical Center–Cancer Care Center, Boise, ID, USA                        |
| <b>Canada</b>         |                                                                                                   |
| Anil Joy              | University of Alberta–Cross Cancer Institute, Edmonton, AB, Canada                                |
| Lise Tremblay         | Université Laval–Centre de Recherche Institut Universitaire de Cardiologie et, Quebec, QC, Canada |
| <b>Belgium</b>        |                                                                                                   |
| Sebahat Ocak          | Catholic University of Louvain–Site Mont Godinne, Yvoir, Belgium                                  |
| Lore Decoster         | Universitair Ziekenhuis Brussel, Brussel, Belgium                                                 |
| <b>Czech Republic</b> |                                                                                                   |
| Pavel Reiterer        | Masarykova Nemocnice v Usti nad Labem, o.z., Usti Nad Labem, Czech Republic                       |
| Jan Vydra             | Ustav onkologie a rehabilitace Na Plesi, Nova Ves Pod, Czech Republic                             |
| Jaromir Roubec        | Vitkovicka Nemocnice, a.s., Ostrava, Czech Republic                                               |
| <b>France</b>         |                                                                                                   |
| Alexis Cortot         | Hôpital Albert Calmette–CHU Lille, Lille, France                                                  |
| Stéphane Culine       | Hôpital Saint-Louis, Paris, France                                                                |
| Sandrine Hiret        | ICO–Site René Gauducheau, Saint Herblain, France                                                  |
| Hervé Léna            | CHU Rennes, Rennes cedex 09, France                                                               |
| Bruno Coudert         | Centre de Lutte Contre le Cancer, Dijon, France                                                   |
| Elisabeth Quoix       | Nouvel Hôpital Civil, Strasbourg, France                                                          |
| Descourt Renaud       | CHRU Brest–Hospital Morvan, Brest, France                                                         |
| Xavier Quantin        | Hôpital Arnaud de Villeneuve, Montpellier cedex 5, France                                         |
| <b>Germany</b>        |                                                                                                   |
| Martin Reck           | Lungen Clinic Großhansdorf, Großhansdorf, Germany                                                 |
| Nikolaj Frost         | Charité Campus Virchow-Klinikum, Berlin, Germany                                                  |
| Juergen Fischer       | Klinik Loewenstein GmbH, Loewenstein, Germany                                                     |
| Matthias Groschek     | Hämatologisch-Onkologische Praxis, Stolberg, Germany                                              |

|                           |                                                                                             |
|---------------------------|---------------------------------------------------------------------------------------------|
| Maike de Wit              | Vivantes Klinikum Neukoelln, Onkologie und Hämatologie, Berlin, Germany                     |
| <b>Israel</b>             |                                                                                             |
| Elizabeth Dudnik          | Rabin Medical Center, Petah Tikva, Israel                                                   |
| Mirjana Wollner           | Rambam Health Care Campus, Haifa, Israel                                                    |
| Julia Dudnik              | Soroka Medical Center, Beer-Sheva, Israel                                                   |
| Amir Onn                  | Chaim Sheba Medical Center, Ramat Gan, Israel                                               |
| Hovav Nechushtan          | Hadassah MC, Jerusalem, Israel                                                              |
| <b>Italy</b>              |                                                                                             |
| Alessandra Bearz          | IRCCS–Centro di Riferimento Oncologico, Aviano, Italy                                       |
| Angelo Delmonte           | Istituto Scientifico Romagnolo Per Lo Studio e La Cura Dei Tumori, Meldola, Italy           |
| Claudio Dazzi             | Azienda Unita Sanitaria Locale di Ravenna–Ospedale S. Maria, Ravenna, Italy                 |
| Filippo De Marinis        | Istituto Europeo di Oncologia, Milano, Italy                                                |
| Alessandro Bertolini      | Azienda Ospedaliera della Valtellina e della Valchiavenna, Sandrio, Italy                   |
| Andrea Bonetti            | Ospedale Mater Salutis, Legnago, Italy                                                      |
| Giulio Metro              | Ospedale Santa Maria della Misericordia, Perugia, Italy                                     |
| Giovanna Finocchiaro      | Humanitas Cancer Center, Rozzano (Milano), Italy                                            |
| Roberto Bianco            | Università Federico II di Napoli, Naples, Italy                                             |
| <b>the Netherlands</b>    |                                                                                             |
| Sayed Hashemi             | Vrije Universiteit Amsterdam–Virje Universiteit Medisch Centrum, Amsterdam, the Netherlands |
| Anne-Marie Dingemans      | Universiteit Maastricht–Academisch Ziekenhuis Maastricht, Maastricht, the Netherlands       |
| <b>Poland</b>             |                                                                                             |
| Rafal Dziadziuszko        | Medical University of Gdańsk, Gdańsk, Poland                                                |
| Dariusz Kowalski          | The Maria Sklodowska Curie Memorial Cancer Centre and Institute of Oncology, Warsaw, Poland |
| <b>Spain</b>              |                                                                                             |
| Alvaro Taus               | Hospital del Mar, Barcelona, Spain                                                          |
| Santiago Viteri           | Hospital Universitario Quirón Dexeus, Barcelona, Spain                                      |
| Yolanda Garcia            | Hospital Parc Tauli, Sabadell, Spain                                                        |
| Juan Delgado Mingorance   | Hospital Infanta Cristina, Badajoz, Spain                                                   |
| Margarita Majem Tarruella | Hospital de la Santa Creu i Sant Pau, Barcelona, Spain                                      |
| Joaquim Bosch-Barrera     | ICO Girona–Hospital Doctor Josep Trueta, Girona, Spain                                      |
| Enriqueta Felip Font      | Hospital Vall d’Hebron, Barcelona, Spain                                                    |
| Jose Lopez-Picazo         | Clínica Universidad de Navarra, Pamplona/Navarra, Spain                                     |
| Juan Coves                | Hospital Son Llatzer, Palma de Mallorca, Spain                                              |
| Antonio Calles            | Hospital General Universitario Gregorio Marañón, Madrid, Spain                              |
| <b>United Kingdom</b>     |                                                                                             |
| Charles Comins            | Southmead Hospital, Westbury-on-Trym Bristol, UK                                            |
| Ivo Hennig                | Kings Mill Hospital, Sutton in Ashfield, UK                                                 |
| Sin Chong Lau             | Blackpool Victoria Hospital, Blackpool, UK                                                  |
| Richard Griffiths         | Clatterbridge Centre for Oncology NHS Foundation Trust, Wirral, UK                          |
| <b>Australia</b>          |                                                                                             |
| Ken O’Byrne               | Princess Alexandra Hospital, Woollongabba, QLD, Australia                                   |
| Craig Underhill           | Border Medical Oncology, Albury, NSW, Australia                                             |
| Steven Kao                | Chris O Brien Lifehouse, Camperdown, NSW, Australia                                         |
| <b>Korea</b>              |                                                                                             |
| Dong-Wan Kim              | Seoul National University Hospital, Seoul, Korea                                            |
| Dae Ho Lee                | Asan Medical Center, Seoul, Korea                                                           |

|                                  |                                                                                  |
|----------------------------------|----------------------------------------------------------------------------------|
| <b>Brazil</b>                    |                                                                                  |
| Pedro Martins De Marchi          | Hospital de Câncer de Barretos–Fundação Pio XII, Barreos, São Paulo, Brazil      |
| Renata Martins                   | Instituto do Câncer do Estado de São Paulo, São Paulo, Brazil                    |
| Claudia Vaz de Melo Sette        | Fundacao do ABC Faculdade de Medicina do ABC, Santo Andre, Brazil                |
| Leticia Carvalho                 | Hospital Paulistano, São Paulo, Brazil                                           |
| Clarissa Maria Cerqueira Mathias | Núcleo de Oncologia da Bahia, Bahia, Brazil                                      |
| Fabio De Figueiredo Chaves       | Hospital Haroldo Juaçaba–Instituto do Cancêr do Ceará, Fortaleza, Brazil         |
| <b>Argentina</b>                 |                                                                                  |
| Susana Kahl Perpina              | Sanatorio Parque Centro Investigacion Pergamino, Pergamino, Argentina            |
| Gonzalo Recondo                  | Center for Clinical Medical Education and Research, Buenos Aires, Argentina      |
| Gaston Martinengo                | Sanatorio Parque, Rosario, Argentina                                             |
| Juan Cundom                      | Fundacion Favaloro para la Docencia e Investigacion Medica, CABA, Argentina      |
| <b>Russia</b>                    |                                                                                  |
| Artem Poltoratsky                | Petrov Research Institute of Oncology, Saint-Petersburg, Russia                  |
| Mikhail Dvorkin                  | BIH of Omsk Region, “Clinical Oncology Dispensary,” Omsk, Russia                 |
| Elena Poddubskaya                | Sechenov University and VitaMed LLC, Moscow, Russia                              |
| Valery Breder                    | FSBSI, Russian Oncological Scientific Center n.a. N.N. Blokhin, Moscow, Russia   |
| Sergei Orlov                     | Pavlov First Saint Petersburg State Medical University, Saint-Petersburg, Russia |
| Daniel Stroyakovskiy             | Moscow City Oncology Hospital #63, Moscow, Russia                                |
| <b>Turkey</b>                    |                                                                                  |
| Irfan Cicin                      | Trakya University Medical Faculty, Edirne, Turkey                                |
| Mustafa Ozguroglu                | Istanbul University Cerrahpasa Medical Faculty, Istanbul, Turkey                 |
| Tuncay Goksel                    | Ege University Medical Faculty, Bornova, Izmir, Turkey                           |
| <b>Peru</b>                      |                                                                                  |
| Manuel Leiva Galvez              | Clínica Ricardo Palma, Lima, Peru                                                |
| <b>Hong Kong</b>                 |                                                                                  |
| Tony Mok                         | Prince of Wales Hospital, Hong Kong                                              |
| James Ho                         | University of Hong Kong, Queen Mary Hospital, Hong Kong                          |
| Victor Lee                       | University of Hong Kong, Queen Mary Hospital, Hong Kong                          |
| Jeannie Yin Kwan Chik            | Queen Elizabeth Hospital Hong Kong, Hong Kong                                    |
| <b>China</b>                     |                                                                                  |
| Jingji Yang                      | Guangdong General Hospital, Guangzhou, China                                     |
| Liyan Jiang                      | Shanghai Chest Hospital, Shanghai, China                                         |
| Jian Fang                        | Peking University Cancer Hospital, Beijing, China                                |
| Ziping Wang                      | Beijing Cancer Hospital, Beijing, China                                          |
| Zhe Liu                          | Beijing Chest Hospital, Capital Medical University, Beijing, China               |
| Cheng Huang                      | Fujian Provincial Cancer Hospital, Fuzhou, China                                 |
| Ying Cheng                       | Jilin Cancer Hospital, Changchun, China                                          |
| Yongmei Liu                      | West China Hospital, Sichuan University, Chengdu, China                          |
| Shiyong Yu                       | Tongji Hospital, Tongji Medical College, Wuhan, China                            |
| Yunpeng Liu                      | The First Hospital of China Medical University, Shenyang, China                  |
| Zhuang Yu                        | The Affiliated Hospital of Qingdao University, Qingdao, China                    |
| Gang Wu                          | Union Hospital of Tongji Medical College of Huazhong, Wuhan, China               |
| Yong Song                        | Nanjing General Hospital, Nanjing, China                                         |

|                 |                                                                                |
|-----------------|--------------------------------------------------------------------------------|
| Li Zhang        | Peking Union Medical College Hospital, Beijing, China                          |
| Jiuwei Cui      | The First Bethune Hospital of Jilin University, Changchun, China               |
| Yun Fan         | Zhejiang Cancer Hospital, Hangzhou, China                                      |
| Yiping Zhang    | Zhejiang Cancer Hospital, Hangzhou, China                                      |
| Nong Yang       | Hunan Cancer Hospital, Changsha, China                                         |
| Yanping Hu      | Hubei Cancer Hospital, Wuhan, China                                            |
| Lejie Cao       | Anhui Provincial Hospital, Hefei, China                                        |
| Cuimin Ding     | Fourth Hospital of Hebei Medical University, Shijiazhuang, China               |
| Yuhui Zhang     | Beijing Chao Yang Hospital, Beijing, China                                     |
| Diansheng Zhong | Tianjin Medical University General Hospital, Tianjin, China                    |
| Anwen Liu       | The Second Affiliated Hospital of Nanchang University,<br>Nanchang City, China |
| Jianying Zhou   | The First Affiliated Hospital, Zhejiang University, Hangzhou,<br>China         |

### eFigure 1. Randomization Schema for ITT and mITT Populations

Patients were initially randomized into the trial based on a local test for ALK. After PA 2.0, ALK testing confirmed by a central laboratory analysis was required. The ITT population consisted of all patients randomized into the trial. The mITT population included patients who were randomized into the trial based on positive local testing with additional central confirmation or were randomized into the trial based on positive central testing. Abbreviations: ALK, anaplastic lymphoma kinase; ITT, intention to treat; mITT, modified intention to treat; PA 2.0, protocol amendment 2.0.

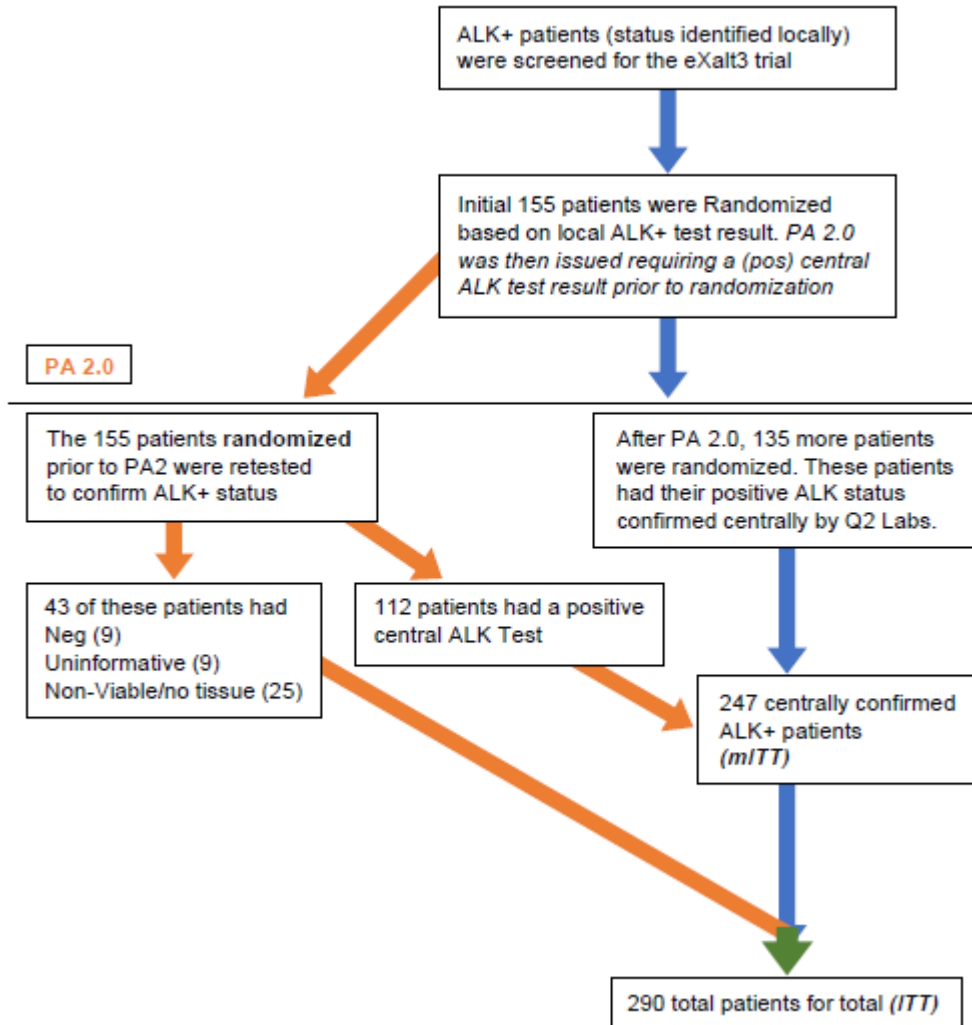



**eFigure 2.** BIRC-Assessed Best Systemic Change from Baseline in the mITT Population. Abbreviations: BIRC, blinded independent review committee; mITT, modified intention to treat.

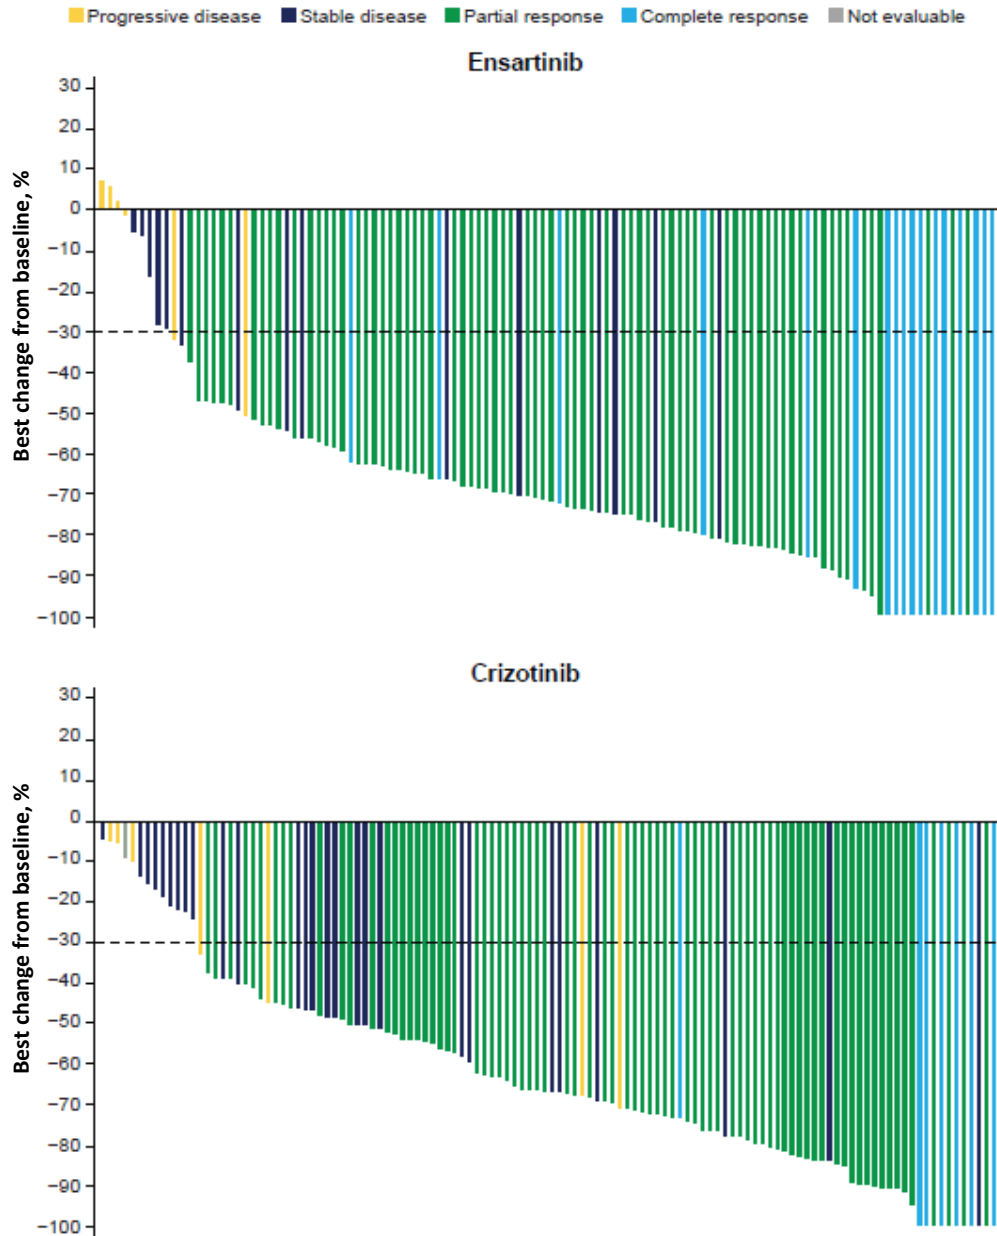

**eFigure 3.** BIRC-Assessed Intracranial Best Change from Baseline in Patients with Measurable and Evaluable Brain Metastases in the mITT Population. Abbreviations: BIRC, blinded independent review committee; mITT, modified intention to treat.

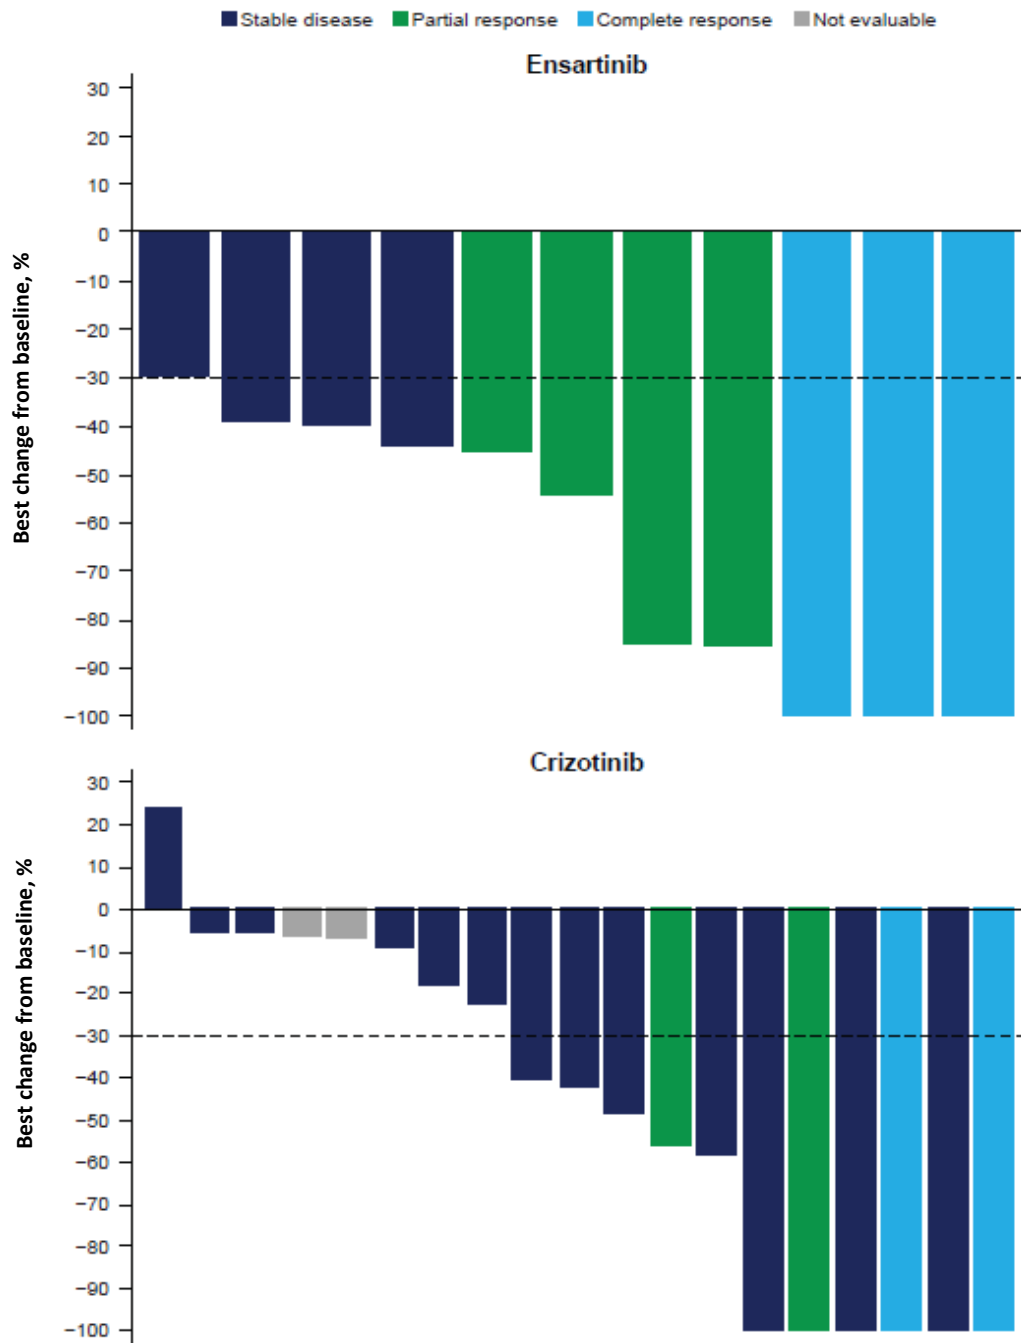

**eFigure 4.** BIRC-Assessed Time to Progression in the Brain in Patients Without Brain Metastases at Baseline in the Modified Intention-to-Treat Population.

Competing risks analysis was per IRR. BIRC, blinded independent review committee; IRR, TTF, time to treatment failure.

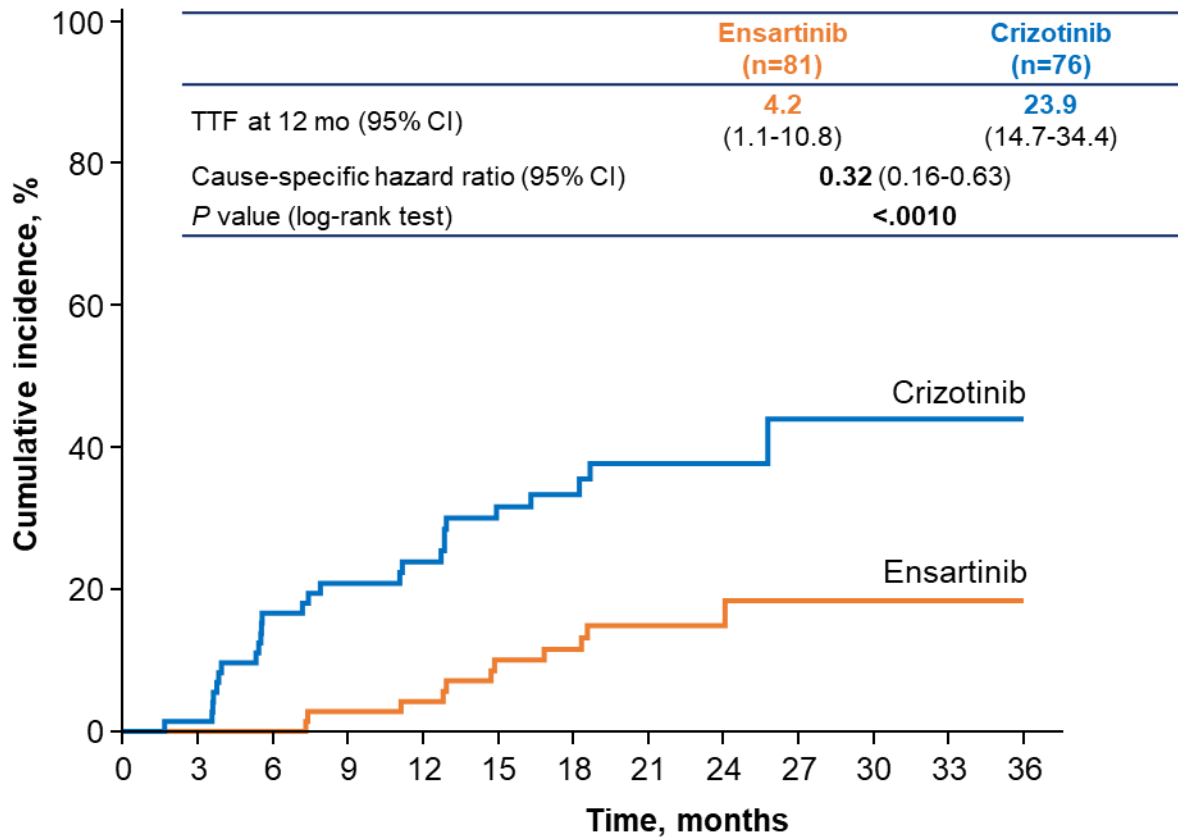

**eFigure 5.** Median Progression-Free Survival (mPFS) in Patients with Brain Metastases at Baseline in mITT

Abbreviations: mPFS, median progression-free survival; NR, not reached.

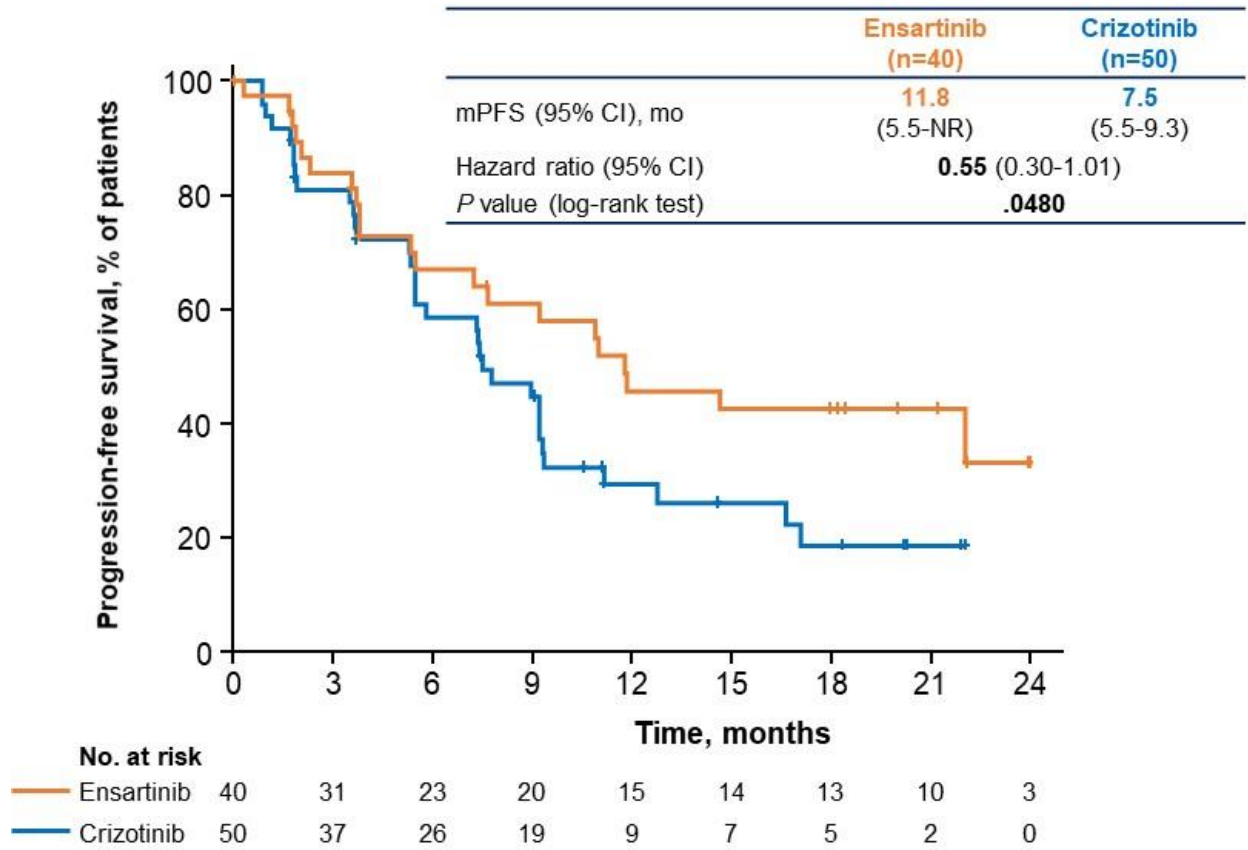

Supplement: jamaoncol-e213523-s002.pdf [file jamaoncol-e213523-s002.pdf]
