# Supplementary material for: Ensartinib vs Crizotinib for Patients With Anaplastic Lymphoma Kinase−Positive Non–Small Cell Lung Cancer: A Randomized Clinical Trial
Source: PubMed Central journal article supplement — JAMA Oncol. 2021 Sep 2;7(11):1–9. doi: 10.1001/jamaoncol.2021.3523 (PMC8414368; doi:10.1001/jamaoncol.2021.3523), 2021-09-02
Supplement: jamaoncol-e213523-s003.pdf [file jamaoncol-e213523-s003.pdf]

## Data Sharing Statement

Horn. Ensartinib vs Crizotinib for Patients With Anaplastic Lymphoma Kinase–Positive Non-Small Cell Lung Cancer. *JAMA Oncol*. Published September 02, 2021. doi:10.1001/jamaoncol.2021.3523

### Data

**Data available:** No

### Additional Information

**Explanation for why data not available:** No data will be shared at this time as the data were generated from an interim analysis and are under consideration to be submitted to regulatory agencies in anticipation of filing in 2021.
